# Supplementary material
Source: publisher figshare collection journal article supplement (https://gsajournals.figshare.com/ndownloader/files/14515268)
Supplement: Supplementary file 1 [file 14515268]

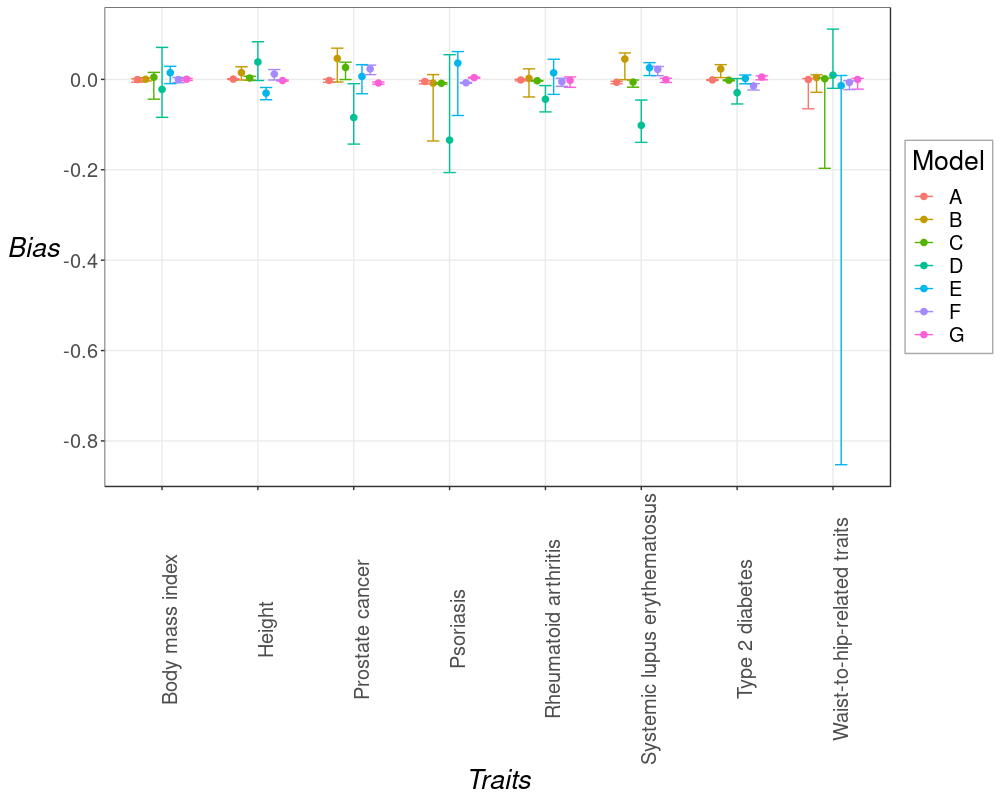


**Figure S4. Prediction bias over the observed parameters calculated for the cumulated number of loci as independent variable.** Models are named as in Table S6 depending on the dependent variable used: mean locus effect size (A) or frequency (B), heritability (C), the mean and standard deviation parameters of the log-normal distribution of effect sizes (D and E respectively) or the mean and standard deviation parameters of the normal distribution of MAF (F and G respectively).
